# Supplementary material for: The novel sandwich-type heteropolyoxotungstates [M2Bi2(β-B-MW9O34)2]14– (M = CoII, ZnII): β-type dimeric heteropolyanions with a transition metal as the central heteroatom and BiIII and M as linking atoms
Source: Royal Society of Chemistry journal article supplement (doi:10.1039/b706018a), 2007-01-01
Supplement: b706018a.pdf [file b706018a.pdf]

Selected Bond Lengths (Å) and Bond Angles (°) for Compounds **1** and **2**

| Compound <b>1</b> |           |                       |            |
|-------------------|-----------|-----------------------|------------|
| <i>Lengths</i>    |           | <i>Angles</i>         |            |
| W(1)–O(20)        | 1.724(5)  | O(27)–Bi(1)–O(30)     | 87.3(2)    |
| W(1)–O(1)         | 1.888(5)  | O(27)–Bi(1)–O(26)     | 90.5(2)    |
| W(1)–O(17)        | 1.890(7)  | O(30)–Bi(1)–O(26)     | 88.5(2)    |
| W(1)–O(3)         | 1.900(6)  | O(27)–Bi(1)–O(2)#2    | 76.08(19)  |
| W(1)–O(19)        | 1.945(6)  | O(30)–Bi(1)–O(2)#2    | 91.5(2)    |
| W(1)–O(11)        | 2.200(4)  | O(26)–Bi(1)–O(2)#2    | 166.6(2)   |
| Bi(1)–O(27)       | 2.083(5)  | O(6)–Co(1)–O(5)       | 106.4(2)   |
| Bi(1)–O(30)       | 2.153(5)  | O(5)–Co(1)–O(11)      | 105.8(2)   |
| Bi(1)–O(26)       | 2.226(5)  | O(27)–Co(1)–O(11)     | 117.2(2)   |
| Bi(1)–O(2)#2      | 2.407(6)  | O(22)#2–Co(2)–O(15)   | 98.0(2)    |
| Bi(1)–O(23)#2     | 2.544(5)  | O(15)–Co(2)–O(27)     | 91.5(2)    |
| Co(1)–O(6)        | 1.933(5)  | O(22)#2–Co(2)–O(27)   | 170.12(19) |
| Co(1)–O(5)        | 1.939(6)  | O(15)–Co(2)–O(27)#2   | 166.11(19) |
| Co(1)–O(27)       | 1.960(4)  | O(22)#2–Co(2)–O(27)#2 | 89.6(2)    |
| Co(1)–O(11)       | 1.995(6)  | O(27)–Co(2)–O(27)#2   | 81.6(2)    |
| Co(2)–O(15)       | 2.067(5)  |                       |            |
| Co(2)–O(22)#2     | 2.069(6)  |                       |            |
| Co(2)–O(27)       | 2.109(5)  |                       |            |
| Co(2)–O(23)#2     | 2.110(6)  |                       |            |
| Co(2)–O(27)#2     | 2.116(6)  |                       |            |
| Co(2)–O(2)        | 2.117(6)  |                       |            |
| Compound <b>2</b> |           |                       |            |
| <i>Lengths</i>    |           | <i>Angles</i>         |            |
| W(1)–O(22)        | 1.735(18) | O(27)#2–Bi(1)–O(14)   | 88.7(7)    |
| W(1)–O(12)        | 1.813(16) | O(27)#2–Bi(1)–O(11)   | 90.3(6)    |
| W(1)–O(1)         | 1.914(13) | O(14)–Bi(1)–O(11)     | 89.5(7)    |
| W(1)–O(13)        | 1.945(19) | O(14)–Bi(1)–O(8)#2    | 90.4(7)    |
| W(1)–O(20)        | 2.066(18) | O(11)–Bi(1)–O(8)#2    | 167.8(6)   |
| W(1)–O(7)         | 2.175(15) | O(27)#2–Bi(1)–O(8)#2  | 77.5(5)    |
| Bi(1)–O(27) #2    | 2.061(16) | O(28)–Zn(1)–O(30)     | 107.2(7)   |
| Bi(1)–O(14)       | 2.177(19) | O(30)–Zn(1)–O(7)      | 105.7(6)   |
| Bi(1)–O(11)       | 2.289(16) | O(7)–Zn(1)–O(27)      | 117.6(8)   |
| Bi(1)–O(8) #2     | 2.378(16) | O(9)–Zn(2)–O(27)#2    | 91.2(7)    |
| Bi(1)–O(12)       | 2.48(2)   | O(9)–Zn(2)–O(23)      | 98.0(8)    |
| Zn(1)–O(28)       | 1.936(15) | O(23)#2–Zn(2)–O(27)   | 170.3(7)   |
| Zn(1)–O(30)       | 1.953(18) | O(9)–Zn(2)–O(27)      | 165.8(7)   |
| Zn(1)–O(7)        | 1.954(18) | O(27)#2–Zn(2)–O(27)   | 82.3(7)    |
| Zn(1)–O(27)       | 1.959(16) | O(8)–Zn(2)–O(27)      | 80.9(6)    |
| Zn(2)–O(9)        | 2.082(17) |                       |            |
| Zn(2)–O(23)       | 2.10(2)   |                       |            |

|                |           |  |
|----------------|-----------|--|
| Zn(2)-O(27) #2 | 2.108(18) |  |
| Zn(2)-O(8)     | 2.133(15) |  |
| Zn(2)-O(12)    | 2.134(17) |  |
| Zn(2)-O(27)    | 2.168(16) |  |

Symmetry transformations used to generate equivalent atoms:

#1  $-x+2, -y+1, -z+2$     #2  $-x+1, -y+2, -z+1$
